# Supplementary material for: Leveraging the Power of Images in Managing Product Return Rates
Source: Atypon-hosted journal article supplement (doi:10.1287/mksc.2023.1451), 2023-07-24

**Online Appendix A. Proof that the Profit-Maximizing Policy is a Threshold Policy, that the Threshold Policy is Intuitive, and that Profits are Decreasing in Predictive Uncertainty.**

**Result 1.** Suppose (1) the firm's prior on the profitability of an item,  $\pi$ , is normally distributed,  $\pi \sim \mathcal{N}(\mu_0; \sigma_0^2)$ , (2) the firm observes an estimate of profitability  $\hat{\pi}|\pi \sim \mathcal{N}(\pi; \sigma_1^2)$ , and (3) the firm seeks a policy to decide whether to put an item online or not. Then the profit maximizing policy,  $\mathcal{P}(\phi)$ , is a threshold policy:

$$(A1) \quad \mathcal{P}(\phi) = \begin{cases} 1 & \text{if } \hat{\pi} \geq -\mu_0 \frac{\sigma_1^2}{\sigma_0^2} \\ 0 & \text{if } \hat{\pi} < -\mu_0 \frac{\sigma_1^2}{\sigma_0^2} \end{cases}$$

The policy in Equation A1 is intuitive. For example,

- If predictions are perfect, then  $\sigma_1^2 = 0$  and the policy reverts to that of perfect prediction; launch those items for which  $\hat{\pi} \geq 0$ .
- If the model has no predictive ability, then  $\sigma_1^2 \rightarrow \infty$  and the policy reverts to the prior mean,  $\mu_0$ ; launch all items if and only if the prior mean is positive.
- If there is no uncertainty in the prior, then  $\sigma_0^2 \rightarrow 0$  and the policy again reverts to the prior mean; launch all items if and only if the prior mean is positive.
- For finite values of  $\sigma_1^2$  and  $\sigma_0^2$ , the ratio,  $\sigma_1^2/\sigma_0^2$ , modifies the amount by which the predicted profits must exceed prior beliefs in order to launch.

**Proof of the threshold policy:** The firm solves the following optimization problem:

$$(A2) \quad \max_{\mathcal{P}(\phi) \in [0,1]} \mathbb{E}[\mathcal{P}(\phi) * \pi + (1 - \mathcal{P}(\phi)) * 0] = \max_{\mathcal{P}(\phi) \in [0,1]} \mathbb{E}[\mathcal{P}(\phi) * \pi]$$

where  $\phi \equiv (\hat{\pi}, \mu_0, \sigma_0^2, \sigma_1^2)$  is the set of all known parameters;  $\hat{\pi}|\pi \sim \mathcal{N}(\pi; \sigma_1^2)$  and  $\pi \sim \mathcal{N}(\mu_0; \sigma_0^2)$

Using the law of iterative expectations, we rewrite the initial maximization problem (A2) as:

$$(A3) \quad \max_{\mathcal{P}(\phi) \in [0,1]} \mathbb{E}[\mathcal{P}(\phi) * \pi] = \max_{\mathcal{P}(\phi) \in [0,1]} \mathbb{E}[\mathcal{P}(\phi) * \mathbb{E}[\pi|\phi]] = \max_{\mathcal{P}(\phi) \in [0,1]} \mathbb{E}[\mathcal{P}(\phi) * \mathbb{E}[\pi|\hat{\pi}]]$$

The last step relies on the assumption that  $\sigma_0, \sigma_1, \mu_0$  are observable.

Because  $\mathbb{E}[\pi|\phi]$  is a function of observables,  $\phi$ , we can denote  $\mathbb{E}[\pi|\phi] = f(\phi)$ . Equation (A3) is rewritten as:

$$(A4) \quad \max_{\mathcal{P}(\phi) \in [0,1]} \mathbb{E}[\mathcal{P}(\phi) * f(\phi)]$$

Equation (A4) implies that the optimal policy  $\mathcal{P}^*(\phi)$  has the following form ( $\mathcal{J}(\cdot)$  is an indicator function):

$$(A5) \quad \mathcal{P}^*(\phi) = \mathcal{J}(f(\phi) \geq 0) = \mathcal{J}(\mathbb{E}[\pi|\phi] \geq 0)$$

We show in the following that, for the case of normal priors, this policy would have a threshold form. [Note that the optimal policy in Equation (A5) does not depend on the normality assumption profitability; the policy is easily generalized to other distributions.]

Because  $\hat{\pi}$  is normally distributed conditionally on  $\pi$  and since the prior is also normally distributed, the posterior is normally distributed. Using standard formulae, we write:

$$(A6) \quad \pi|\hat{\pi} \sim \mathcal{N}\left(\frac{\hat{\pi}\sigma_0^2 + \mu_0\sigma_1^2}{\sigma_0^2 + \sigma_1^2}; \frac{\sigma_0^2\sigma_1^2}{\sigma_0^2 + \sigma_1^2}\right) \quad \text{and} \quad \hat{\pi} \sim \mathcal{N}(\mu_0; \sigma_0^2 + \sigma_1^2)$$

From (A6), it follows that:

$$(A7) \quad \mathbb{E}[\pi|\phi] = \frac{\hat{\pi}\sigma_0^2 + \mu_0\sigma_1^2}{\sigma_0^2 + \sigma_1^2} \Rightarrow \mathcal{P}^*(\phi) = \mathcal{J}(\mathbb{E}[\pi|\phi] \geq 0) = \mathcal{J}\left(\hat{\pi} \geq -\mu_0 * \frac{\sigma_1^2}{\sigma_0^2}\right)$$

Which is the threshold policy.

**Result 2.** Under the assumptions of Result 1, the optimal expected profit is:

$$(A8) \quad \Pi^* = \left(1 - \Phi\left(-\frac{\mu_0}{\sigma_v}\right)\right) * \mu_0 + \sigma_v * \varphi\left(-\frac{\mu_0}{\sigma_v}\right)$$

Where  $\Phi(\cdot)$  and  $\varphi(\cdot)$  are the standard normal CDF and PDF respectively, and  $\sigma_v = \frac{\sigma_0^2}{\sqrt{\sigma_0^2 + \sigma_1^2}}$ .

**Proof:** By substituting the optimal policy from (A7) and conditional expectation from (A8) to (A2), we rewrite the expected optimal profit as:

$$(A9) \quad \Pi^* = \mathbb{E}\left[\mathcal{J}\left(\hat{\pi} \geq -\mu_0 * \frac{\sigma_1^2}{\sigma_0^2}\right) * \left(\frac{\hat{\pi}\sigma_0^2 + \mu_0\sigma_1^2}{\sigma_0^2 + \sigma_1^2}\right)\right] = \mathbb{E}[\mathcal{J}(v \geq 0) * v] = \mathbb{P}[v \geq 0]\mathbb{E}[v|v \geq 0]$$

where  $v = \frac{\hat{\pi}\sigma_0^2 + \mu_0\sigma_1^2}{\sigma_0^2 + \sigma_1^2} \sim \mathcal{N}\left(\frac{\hat{\pi}\sigma_0^2 + \mu_0\sigma_1^2}{\sigma_0^2 + \sigma_1^2}; \frac{\sigma_0^4}{(\sigma_0^2 + \sigma_1^2)^2}(\sigma_0^2 + \sigma_1^2)\right) \sim \mathcal{N}\left(\mu_0; \frac{\sigma_0^4}{\sigma_0^2 + \sigma_1^2}\right) \sim \mathcal{N}(\mu_0; \sigma_v^2)$

Because  $v$  is normally distributed, (A9) can be rewritten using the formula for the expectation of the truncated normal distribution:

$$(A10) \quad \Pi^* = \left(1 - \Phi\left(-\frac{\mu_0}{\sigma_v}\right)\right) * \mu_0 + \sigma_v * \varphi\left(-\frac{\mu_0}{\sigma_v}\right)$$

**Result 3.** The expected profit under the optimal policy is a decreasing function of  $\sigma_1^2$ .

**Proof:** Taking the derivative of (A10) with respect to  $\sigma_1^2$ :

$$(A11) \quad -\mu_0 * \varphi\left(-\frac{\mu_0}{\sigma_v}\right) \left(-\frac{\mu_0}{2\sigma_0^2(\sigma_0^2 + \sigma_1^2)^{\frac{1}{2}}}\right) - \frac{\sigma_0^2}{2(\sigma_0^2 + \sigma_1^2)^{\frac{3}{2}}} \varphi\left(-\frac{\mu_0}{\sigma_v}\right) +$$

$$\frac{\sigma_0^2}{(\sigma_0^2 + \sigma_1^2)^{\frac{1}{2}}} \varphi'\left(-\frac{\mu_0}{\sigma_v}\right) \left(-\frac{\mu_0}{2\sigma_0^2(\sigma_0^2 + \sigma_1^2)^{\frac{1}{2}}}\right) = \left(\frac{\mu_0^2}{2\sigma_0^2(\sigma_0^2 + \sigma_1^2)^{\frac{1}{2}}} - \frac{\sigma_0^2}{2(\sigma_0^2 + \sigma_1^2)^{\frac{3}{2}}}\right) +$$

$$\frac{\sigma_0^2}{(\sigma_0^2 + \sigma_1^2)^{\frac{1}{2}}} \left(\frac{\mu_0(\sigma_0^2 + \sigma_1^2)^{\frac{1}{2}}}{\sigma_0^2}\right) \left(-\frac{\mu_0}{2\sigma_0^2(\sigma_0^2 + \sigma_1^2)^{\frac{1}{2}}}\right) \varphi\left(-\frac{\mu_0}{\sigma_v}\right) = \left(\frac{\mu_0^2}{2\sigma_0^2(\sigma_0^2 + \sigma_1^2)^{\frac{1}{2}}} - \frac{\sigma_0^2}{2(\sigma_0^2 + \sigma_1^2)^{\frac{3}{2}}}\right) +$$

$$\left(-\frac{\mu_0^2}{2\sigma_0^2(\sigma_0^2 + \sigma_1^2)^{\frac{1}{2}}}\right) \varphi\left(-\frac{\mu_0}{\sigma_v}\right) = -\frac{\sigma_0^2}{2(\sigma_0^2 + \sigma_1^2)^{\frac{3}{2}}} \varphi\left(-\frac{\mu_0}{\sigma_v}\right)$$

Because  $\varphi(\cdot) > 0$  and  $-\frac{\sigma_0^2}{2(\sigma_0^2 + \sigma_1^2)^{\frac{3}{2}}} < 0$ , the expected profitability is decreasing function of  $\sigma_1^2$  and

therefore an increasing function of model accuracy.

## Online Appendix B. Supporting Tables and Figures

**Table B.1.** Improvement in Predictive Accuracy Varying Minimum Threshold on Online Sales

| Model                                                     | Non-Image Features                         | Image Features | Out of Sample R <sup>2</sup> | Improvement over baseline |
|-----------------------------------------------------------|--------------------------------------------|----------------|------------------------------|---------------------------|
| CNN Features with <b>10</b> as threshold for online sales | Category, seasonality, price, color labels | Deep-learning  | 43.14<br>(0.20)              | +12.75%                   |
| CNN Features with <b>20</b> as threshold for online sales | Category, seasonality, price, color labels | Deep-learning  | 46.88<br>(0.19)              | +13.48%                   |
| CNN Features with <b>30</b> as threshold for online sales | Category, seasonality, price, color labels | Deep-learning  | 51.23<br>(0.17)              | +12.08%                   |

Note: Improvements are calculated for baseline models estimated on the corresponding samples. Standard deviations are reported in parentheses.

**Table B.2.** Tests of Uniqueness, Precision (variance of  $N_{i,purchased}$ ), and Distance from Prior Collections

| Model                                  | Non-Image Features                                             | Image Features | Out of Sample R <sup>2</sup> | Improvement over CNN Features Model |
|----------------------------------------|----------------------------------------------------------------|----------------|------------------------------|-------------------------------------|
| CNN Features                           | Category, seasonality, price, color labels                     | Deep-learning  | 46.88<br>(0.19)              | 0.00%                               |
| CNN Features (including uniqueness)    | Category, seasonality, price, color labels, image uniqueness   | Deep-learning  | 46.82<br>(0.23)              | -0.13%                              |
| CNN Features (including vs. last year) | Category, seasonality, price, color labels, image uniqueness   | Deep-learning  | 44.55<br>(0.39)              | -0.60% (see note)                   |
| CNN Features (precision weighting)     | Category, seasonality, price, color labels, variance weighting | Deep-learning  | 46.77<br>(0.26)              | -0.23%                              |

Notes: The sample of items included when estimating the last-year model exclude products sold only in the first year of the data. A GBRT/CNN model for the same items yields 44.85 (0.33). The -2.8% is relative to this model. Standard deviations are reported in parentheses.

**Table B.3.** Improvement in Predictive Accuracy Using Alternative Prediction Models

| Model                          | Non-Image Features                         | Image Features | Out of Sample R <sup>2</sup> | Improvement over Baseline |
|--------------------------------|--------------------------------------------|----------------|------------------------------|---------------------------|
| GBRT (CNN Features)            | Category, seasonality, price, color labels | Deep-learning  | 46.88<br>(0.19)              | +13.48%                   |
| Bagging Methods (CNN Features) | Category, seasonality, price, color labels | Deep-learning  | 45.35<br>(0.14)              | +9.78%                    |
| LASSO (CNN Features)           | Category, seasonality, price, color labels | Deep-learning  | 44.11<br>(0.32)              | +6.78%                    |

Note: Standard deviations are reported in parentheses.

**Table B.4.** Predictions for the two Largest Categories (Dresses and Shirts)

| Model                        | Non-Image Features                                               | Image Features | Out of Sample R <sup>2</sup> | Improvement over Baseline |
|------------------------------|------------------------------------------------------------------|----------------|------------------------------|---------------------------|
| Non-Image Baseline           | Category, seasonality, price                                     | None           | 57.94<br>(0.27)              | –                         |
| Color-labels                 | Category, seasonality, price, and color labels                   | None           | 59.79<br>(0.24)              | +3.19%                    |
| Automated Color Features     | Category, seasonality, price, color labels                       | RGB            | 60.86<br>(0.22)              | +5.04%                    |
| Automated Color and Patterns | Category, seasonality, price, color labels                       | RGB + Gabor    | 61.91<br>(0.31)              | +6.85%                    |
| Human-coded features         | Category, seasonality, price, color labels, human-coded features | Human-coded    | 61.91<br>(0.27)              | +6.85%                    |
| CNN Features                 | Category, seasonality, price, color labels                       | Deep-learning  | 63.69<br>(0.19)              | +9.92%                    |

Note: Standard deviations are reported in parentheses.

**Table B.5.** Improvement in Predictive Accuracy Using an Alternative CNN

| Model                   | Non-Image Features                         | Image Features | Out of Sample R <sup>2</sup> | Improvement over Baseline |
|-------------------------|--------------------------------------------|----------------|------------------------------|---------------------------|
| ResNet CNN (this paper) | Category, seasonality, price, color labels | Deep-learning  | 46.88<br>(0.19)              | +13.48%                   |
| VGG-19 CNN              | Category, seasonality, price, color labels | Deep-learning  | 46.84<br>(0.18)              | +13.39%                   |

Note: Standard deviations are reported in parentheses.

**Table B.6.** Improvement in Predictive Accuracy Using PCA (nonlinear and linear tested; linear shown)

| Model              | Non-Image Features                         | Image Features | Out of Sample R <sup>2</sup> | Improvement over Baseline |
|--------------------|--------------------------------------------|----------------|------------------------------|---------------------------|
| Color Features     | Category, seasonality, price, color labels | RGB            | 43.48<br>(0.18)              | +5.25%                    |
| Color and Patterns | Category, seasonality, price, color labels | Gabor          | 41.37<br>(0.33)              | +0.15%                    |
| CNN Features       | Category, seasonality, price, color labels | Deep-learning  | 46.55<br>(0.21)              | +12.68%                   |

Note: Standard deviations are reported in parentheses.

**Table B.7.** Predictions Using Automated Pattern & Color Image-Processing Features

| Model                   | Non-Image Features                         | Image Features | Out of Sample R <sup>2</sup> | Improvement over Baseline |
|-------------------------|--------------------------------------------|----------------|------------------------------|---------------------------|
| Non-Image Baseline      | Category, seasonality, price               | None           | 41.31<br>(0.18)              | –                         |
| Color Features          | Category, seasonality, price, color labels | RGB            | 44.06<br>(0.20)              | +6.66%                    |
| Pattern Features        | Category, seasonality, price, color labels | Gabor          | 44.34<br>(0.23)              | +7.33%                    |
| Color and Patterns      | Category, seasonality, price, color labels | RGB + Gabor    | 45.28<br>(0.18)              | +9.61%                    |
| CNN Features            | Category, seasonality, price, color labels | Deep-learning  | 46.88<br>(0.19)              | +13.48%                   |
| CNN Features all images | Category, seasonality, price, color labels | Deep-learning  | 47.48<br>(0.22)              | +14.93%                   |

Notes: All models use LightGBM and differ only with respect to the set of features included. Standard deviations are reported in parentheses.

**Table B.8.** Improvement in Predictive Accuracy Using Alternative Image-Feature Extraction Methods

| Model        | Non-Image Features                         | Image Features | Out of Sample R <sup>2</sup> | Improvement over Baseline |
|--------------|--------------------------------------------|----------------|------------------------------|---------------------------|
| RGB Features | Category, seasonality, price, color labels | RGB            | 44.04<br>(0.20)              | +6.61%                    |
| HSV Features | Category, seasonality, price, color labels | HSV            | 44.30<br>(0.14)              | +7.24%                    |
| ORB Features | Category, seasonality, price, color labels | ORB            | 43.53<br>(0.25)              | +5.37%                    |

Note: Standard deviations are reported in parentheses.

**Table B.9.** Online Sales and Return rates, Offline Sales and Return Rates, and Model-Predicted Online Return Rates by Product Category (based on all sales). Models estimated for categories with at least 400 items with  $\geq 20$  sales.

| Category    | Online Sales | Online Returns | Online Return Rate | Offline Sales | Offline Returns | Offline Return Rate | Number of Products $\geq 20$ Sales | Predictive Accuracy Online, Out of Sample R <sup>2</sup> (Benchmark) | Predictive Accuracy Online, Out of Sample R <sup>2</sup> (Main) |
|-------------|--------------|----------------|--------------------|---------------|-----------------|---------------------|------------------------------------|----------------------------------------------------------------------|-----------------------------------------------------------------|
| Dresses     | 96,754       | 69,626         | 71.96%             | 45,923        | 1,615           | 3.52%               | 759                                | 28.11<br>(0.65)                                                      | 31.13<br>(0.83)                                                 |
| Shirts      | 80,586       | 39,379         | 48.87%             | 299,313       | 7,007           | 2.34%               | 1,213                              | 14.78<br>(0.59)                                                      | 24.08<br>(0.77)                                                 |
| Blouses     | 43,413       | 23,292         | 53.65%             | 104,778       | 2,667           | 2.55%               | 687                                | 4.33<br>(0.96)                                                       | 15.78<br>(1.00)                                                 |
| Pants       | 36,183       | 21,209         | 58.62%             | 103,353       | 3,264           | 3.16%               | 496                                | -1.10<br>(1.16)                                                      | -0.17<br>(1.25)                                                 |
| Knit        | 31,893       | 15,708         | 49.25%             | 137,227       | 3,889           | 2.83%               | 511                                | 1.80<br>(1.24)                                                       | 17.35<br>(1.13)                                                 |
| Jackets     | 21,304       | 12,228         | 57.40%             | 24,385        | 876             | 3.59%               | 302                                |                                                                      |                                                                 |
| Blazer      | 13,190       | 7,627          | 57.82%             | 27,748        | 993             | 3.58%               | 166                                | -                                                                    | -                                                               |
| Cardigans   | 11,315       | 4,167          | 36.83%             | 16,462        | 507             | 3.08%               | 69                                 | -                                                                    | -                                                               |
| Skirts      | 9,252        | 5,259          | 56.84%             | 26,884        | 746             | 2.77%               | 135                                | -                                                                    | -                                                               |
| Coats       | 5,170        | 3,238          | 62.63%             | 1,299         | 49              | 3.77%               | 88                                 | -                                                                    | -                                                               |
| Bolero      | 4,867        | 3,367          | 69.18%             | 0             | 0               | 0.00%               | 41                                 | -                                                                    | -                                                               |
| Sweatshirts | 3,862        | 2,170          | 56.19%             | 6,126         | 191             | 3.12%               | 56                                 | -                                                                    | -                                                               |
| Jumpsuits   | 1,902        | 1,303          | 68.51%             | 462           | 10              | 2.16%               | 27                                 | -                                                                    | -                                                               |
| Top         | 1,543        | 728            | 47.18%             | 0             | 0               | 0.00%               | 27                                 | -                                                                    | -                                                               |
| Leather     | 614          | 287            | 46.74%             | 809           | 34              | 4.20%               | 8                                  | -                                                                    | -                                                               |

**Table B.10.** Online Sales and Return rates, Offline Sales and Return Rates, and Model-Predicted Online Return Rates by Color Labels† Models estimated for color-label categories with at least 400 items with  $\geq 20$  sales.

| Color Category | Online Sales | Online Returns | Online Return Rate | Offline Sales | Offline Returns | Offline Return Rate | Number of Products $\geq 20$ Sales | Predictive Accuracy Online, Out of Sample $R^2$ (Benchmark) | Predictive Accuracy Online, Out of Sample $R^2$ (Main) |
|----------------|--------------|----------------|--------------------|---------------|-----------------|---------------------|------------------------------------|-------------------------------------------------------------|--------------------------------------------------------|
| Blue           | 84,947       | 49,054         | 57.75%             | 217,457       | 5,658           | 2.60%               | 1056                               | 45.28<br>(0.28)                                             | 50.06<br>(0.47)                                        |
| Grey           | 67,381       | 39,320         | 58.35%             | 92,119        | 2,787           | 3.02%               | 951                                | 34.06<br>(0.58)                                             | 36.36<br>(0.54)                                        |
| White          | 48,751       | 26,913         | 55.21%             | 118,060       | 3,154           | 2.67%               | 743                                | 23.25<br>(0.60)                                             | 23.79<br>(0.87)                                        |
| Red            | 42,708       | 25,749         | 60.29%             | 81,625        | 2,294           | 2.81%               | 542                                | 45.80<br>(0.62)                                             | 50.90<br>(0.79)                                        |
| Brown          | 41,540       | 23,557         | 56.71%             | 84,227        | 2,446           | 2.90%               | 590                                | 19.09<br>(0.77)                                             | 24.72<br>(0.95)                                        |
| Black          | 32,444       | 19,305         | 59.50%             | 67,663        | 2,028           | 3.00%               | 411                                | 41.01<br>(0.53)                                             | 42.57<br>(0.83)                                        |
| Green          | 10,550       | 6,581          | 62.38%             | 19,815        | 466             | 2.35%               | 144                                | -                                                           | -                                                      |
| Pink           | 3,539        | 2,118          | 59.85%             | 8,588         | 249             | 2.90%               | 53                                 | -                                                           | -                                                      |
| Orange         | 3,054        | 1,865          | 61.07%             | 7,701         | 202             | 2.62%               | 53                                 | -                                                           | -                                                      |
| Yellow         | 1,670        | 1,017          | 60.90%             | 2,356         | 64              | 2.72%               | 23                                 | -                                                           | -                                                      |
| Violet         | 938          | 617            | 65.78%             | 2,273         | 66              | 2.90%               | 14                                 | -                                                           | -                                                      |
| Several        | 318          | 151            | 47.48%             | 84,314        | 2224            | 2.66%               | 5                                  | -                                                           | -                                                      |

**Figure B.11.** Return Rate by Postlaunch Time of Purchase, Day of the Week and Month

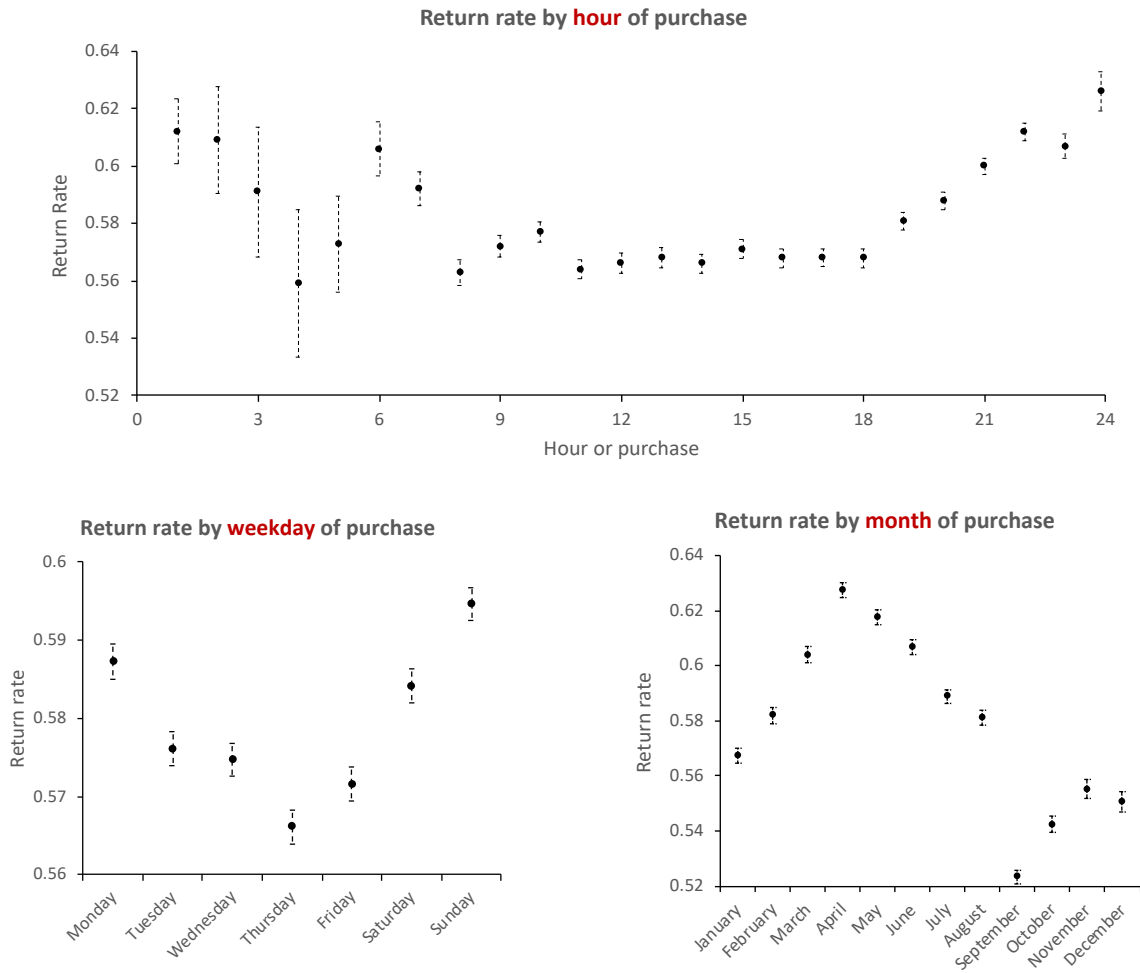

**Table B.12.** Product Return Rates and Price Discounts

| <b>Dependent Measure: Return rate</b> |                      |                      |                     |                     |
|---------------------------------------|----------------------|----------------------|---------------------|---------------------|
|                                       | <b>Model 1</b>       | <b>Model 2</b>       | <b>Model 3</b>      | <b>Model 4</b>      |
| Proportion discounted                 | 0.080***<br>(0.008)  | 0.086***<br>(0.007)  | 0.088***<br>(0.007) | 0.078***<br>(0.007) |
| Price (log10)                         | 0.228***<br>(0.012)  | 0.221***<br>(0.012)  | 0.214***<br>(0.012) | 0.279***<br>(0.008) |
| Intercept                             | -0.156***<br>(0.044) | -0.113***<br>(0.041) | -0.083**<br>(0.041) | 0.028**<br>(0.015)  |
| Category Controls                     | Yes                  | Yes                  | Yes                 | No                  |
| Color Controls                        | Yes                  | Yes                  | No                  | No                  |
| Seasonality Controls                  | Yes                  | No                   | No                  | No                  |
| # observations                        | 4585                 | 4585                 | 4585                | 4585                |
| Adjusted R-squared (model)            | 0.434                | 0.414                | 0.403               | 0.258               |

Note: Standard errors are heteroskedasticity robust (\* $p \leq 0.1$ , \*\* $p \leq 0.05$ , \*\*\* $p \leq 0.01$ ). R-squared is in-sample

**Table B.13.** Interpreting the Effect of Human-coded features (HCF) on Item Return Rates

|                            | Regression Model     | SHAP Values |
|----------------------------|----------------------|-------------|
| Asymmetric                 | 0.022***<br>(0.008)  | 0.92        |
| Floral                     | -0.038***<br>(0.010) | -0.90       |
| Striped                    | -0.063***<br>(0.009) | -0.95       |
| Geometric/abstract         | -0.020***<br>(0.007) | -0.89       |
| Lace details               | 0.010<br>(0.008)     | 0.85        |
| Metallic/sequin details    | 0.008<br>(0.006)     | 0.82        |
| Graphic details            | 0.008<br>(0.013)     | 0.34        |
| Text details               | 0.036*<br>(0.021)    | 0.69        |
| Short Sleeves              | -0.020***<br>(0.006) | -0.81       |
| Medium Sleeves             | -0.032***<br>(0.008) | -0.84       |
| Long Sleeves               | -0.032***<br>(0.007) | -0.87       |
| Belt                       | 0.025***<br>(0.010)  | 0.88        |
| Zipper                     | -0.027**<br>(0.012)  | -0.80       |
| Intercept                  | 0.039<br>(0.026)     | –           |
| Price (log10)              | 0.256***<br>(0.014)  | –           |
| Category Controls          | Yes                  | Yes         |
| Color Controls             | Yes                  | Yes         |
| Seasonality Controls       | Yes                  | Yes         |
| # observations             | 1,972                | 1,972       |
| Adjusted R-squared (model) | 0.628                | –           |

Notes: Standard errors are heteroskedasticity robust (\* $p \leq 0.1$ , \*\* $p \leq 0.05$ , \*\*\* $p \leq 0.01$ ). Products included if sales  $\geq 20$ .

**Figure B.14.** Impact of Color Clusters on Return Rates

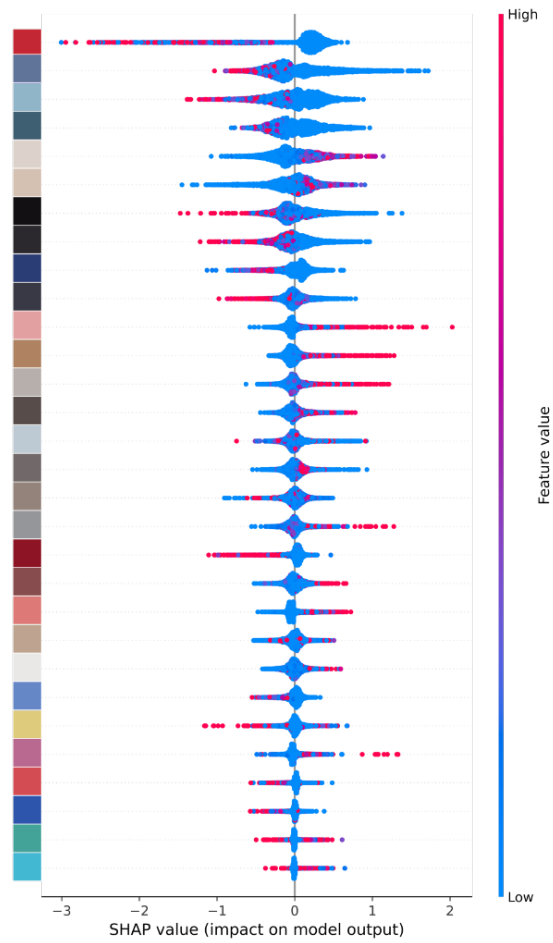

**Figure B.15.** The Impact of Non-Image Features

(a) Price and Category

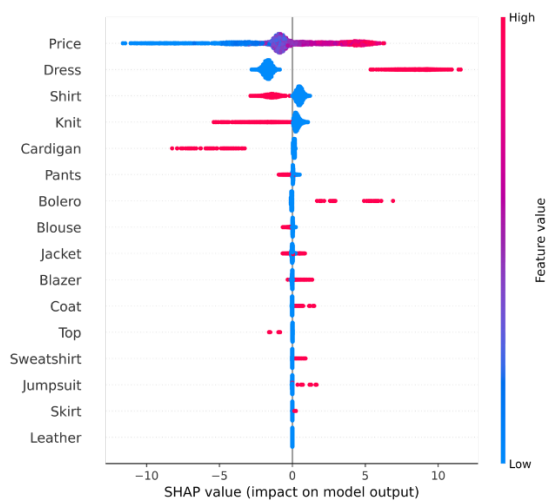

(b) Seasonality

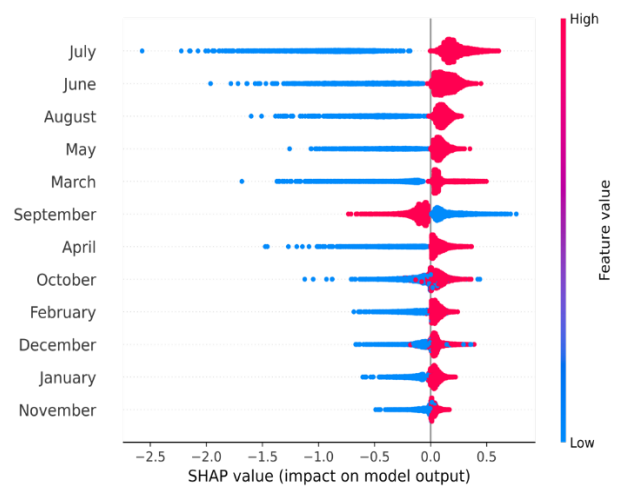

Supplement: mksc.2023.1451.sm1.pdf [file mksc.2023.1451.sm1.pdf]
